# Supplementary material for: Design and synthesis of novel dual-target agents for HDAC1 and CK2 inhibition
Source: Royal Society of Chemistry journal article supplement (doi:10.1039/c6ra09717k), 2016-01-01

# Design and Synthesis of Novel Dual-Target Agents for HDAC1 and CK2 Inhibition

*Maciej Purwin,<sup>†‡</sup> Jorge Hernández-Toribio,<sup>†</sup> Claire Coderch,<sup>†</sup> Rostyslav Panchuk,<sup>±</sup>  
Nadiya Skorokhyd,<sup>±</sup> Kamila Filipiak,<sup>†</sup> Beatriz de Pascual-Teresa,<sup>†\*</sup> and Ana Ramos<sup>†\*</sup>*

<sup>†</sup>Departamento de Química y Bioquímica, Facultad de Farmacia, Universidad CEU San Pablo, Urbanización Monteprincipe, 28668, Boadilla del Monte, Madrid, Spain.

<sup>‡</sup>Department of Organic Chemistry, The Faculty of Pharmacy with the Division of Laboratory Medicine, Medical University of Białystok, A. Mickiewicza 2A, 15-222, Białystok, Poland.

<sup>±</sup>Institute of Cell Biology, NAS of Ukraine, Drahomanov str. 14/16, 79005 Lviv, Ukraine.

## SUPPORTING INFORMATION

### Table of Content

|                                                                                                                           |         |
|---------------------------------------------------------------------------------------------------------------------------|---------|
| Figura S1: Cytotoxic activity of <b>5c</b> and <b>5e</b> compared to TBB and SAHA .....                                   | S2      |
| Figure S2: Substrate-like molecule/HDAC-8 complex.....                                                                    | S3      |
| Figure S3: <b>5a-5h</b> /HDAC-1 complexes.....                                                                            | S4      |
| Figure S4: ANP/CK2 complex.....                                                                                           | S5      |
| Figure S5: TBB/CK2 complex.....                                                                                           | S6      |
| Figure S6: TBI/CK2 complex.....                                                                                           | S7      |
| Figure S7: <b>5a-5h</b> /CK2 complexes.....                                                                               | S8      |
| Figure S8: HDAC1 structures from the SWISS MODEL and the HDAC1 crystal structure as it appears in PDB structure 4BKX..... | S9      |
| <sup>1</sup> H and <sup>13</sup> C NMR spectra of compounds <b>5a-5h</b> .....                                            | S10-S17 |

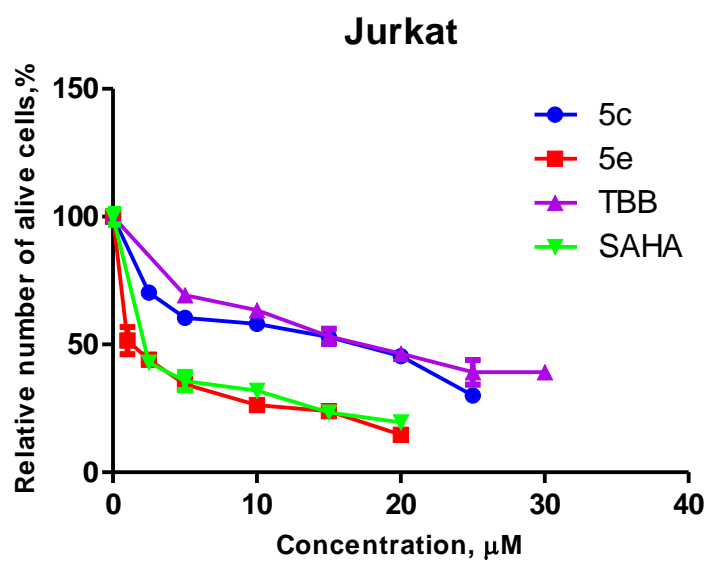

Supplementary Figure S1. Cytotoxic activity of compounds **5c** and **5e** compared to TBB and SAHA towards human T-leukemia cells of Jurkat line .

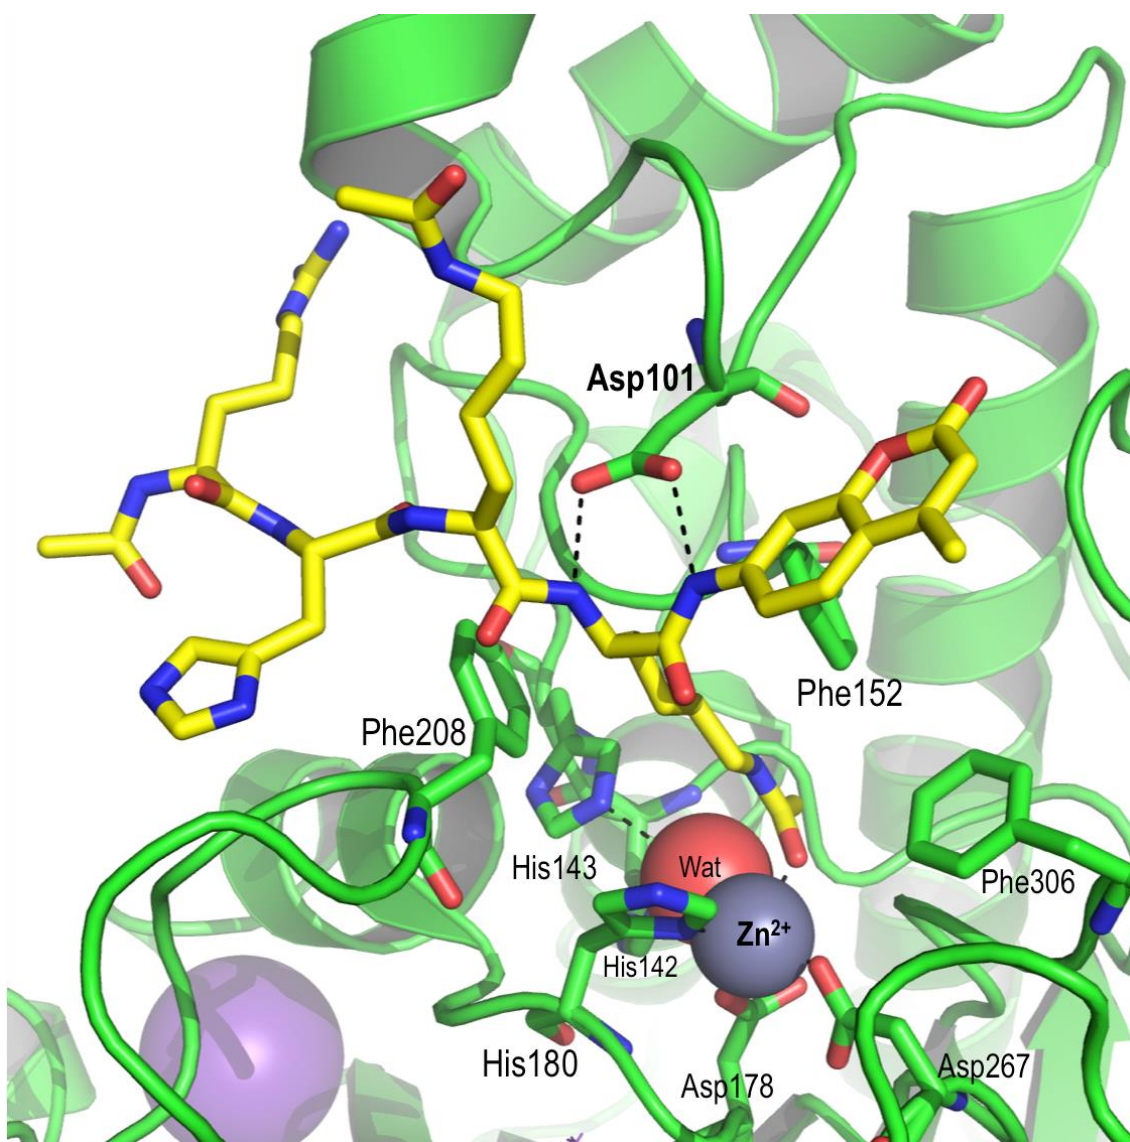

Supplementary Figure S2: PyMOL stick and cartoon representation of the binding of a substrate-like molecule (yellow sticks) to HDAC-8 (green) such as it appears in PDB structure 2V5W. The main amino acids involved in the binding are represented as sticks and the catalytic  $\text{Zn}^{2+}$  and the water molecule that completes its coordination sphere are represented as a grey and red sphere respectively. Hydrogen bonding and coordinating interactions are shown as dashed lines and the residues involved are labelled in bold.

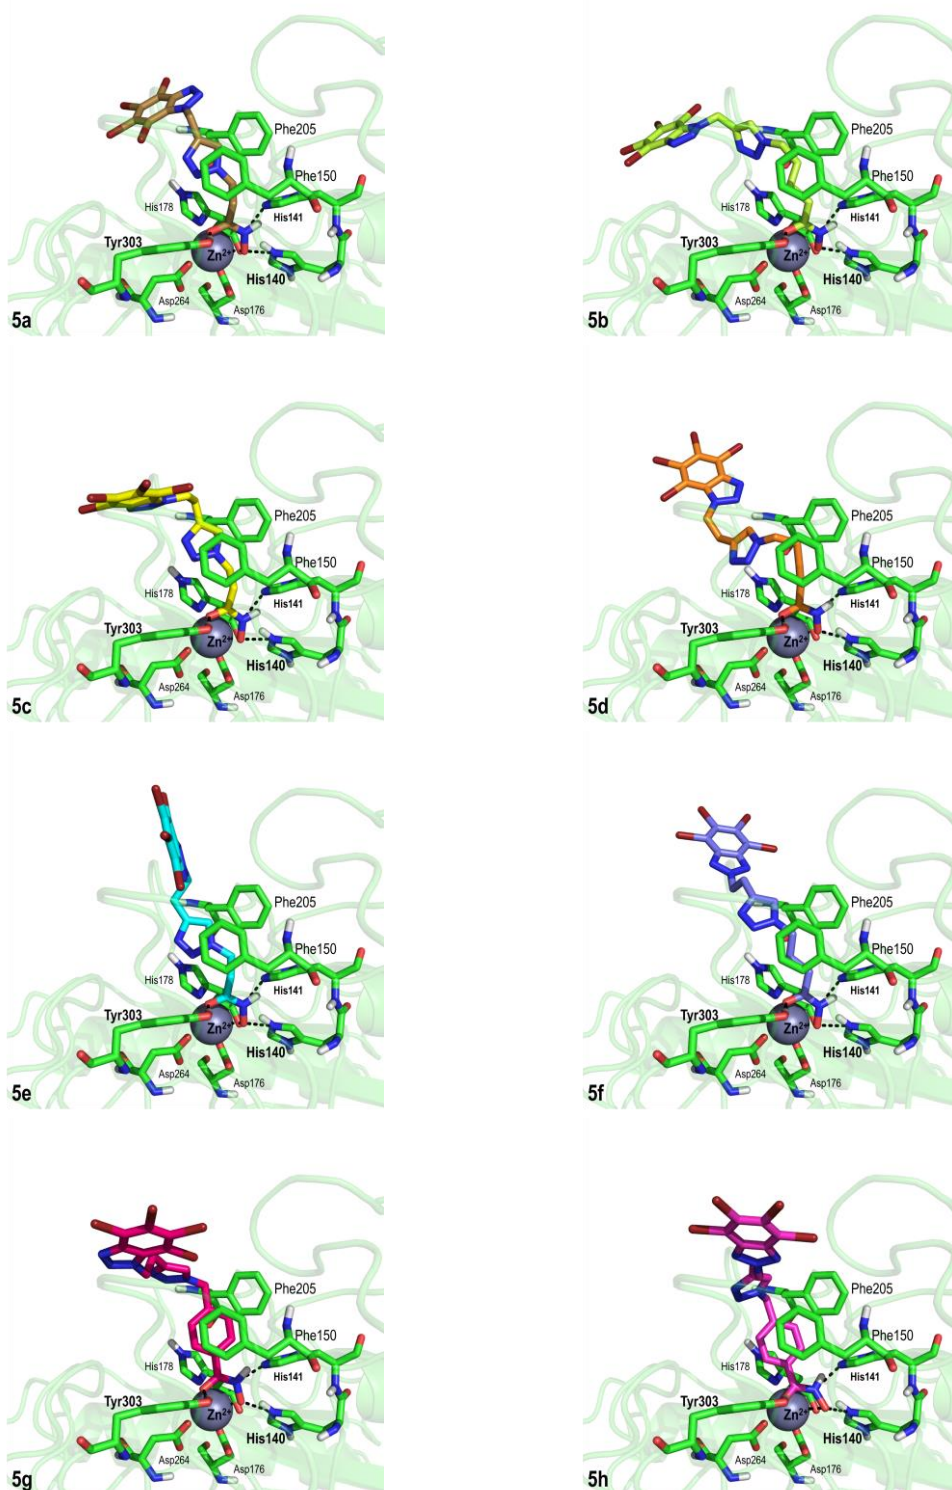

Supplementary Figure S3: PyMOL stick and cartoon representation of the docking poses obtained for the series of new ligands in HDAC1. The main amino acids involved in the binding are represented as sticks and the catalytic Zn<sup>2+</sup> is represented as a grey sphere. Hydrogen bonding and coordinating interactions are shown as dashed lines and the residues involved are labelled in bold. Compounds **5a** to **5d** are coloured in shades of yellow, **5e** and **5f** are coloured in shades of blue, and **5g** and **5h** are coloured in shades of pink.

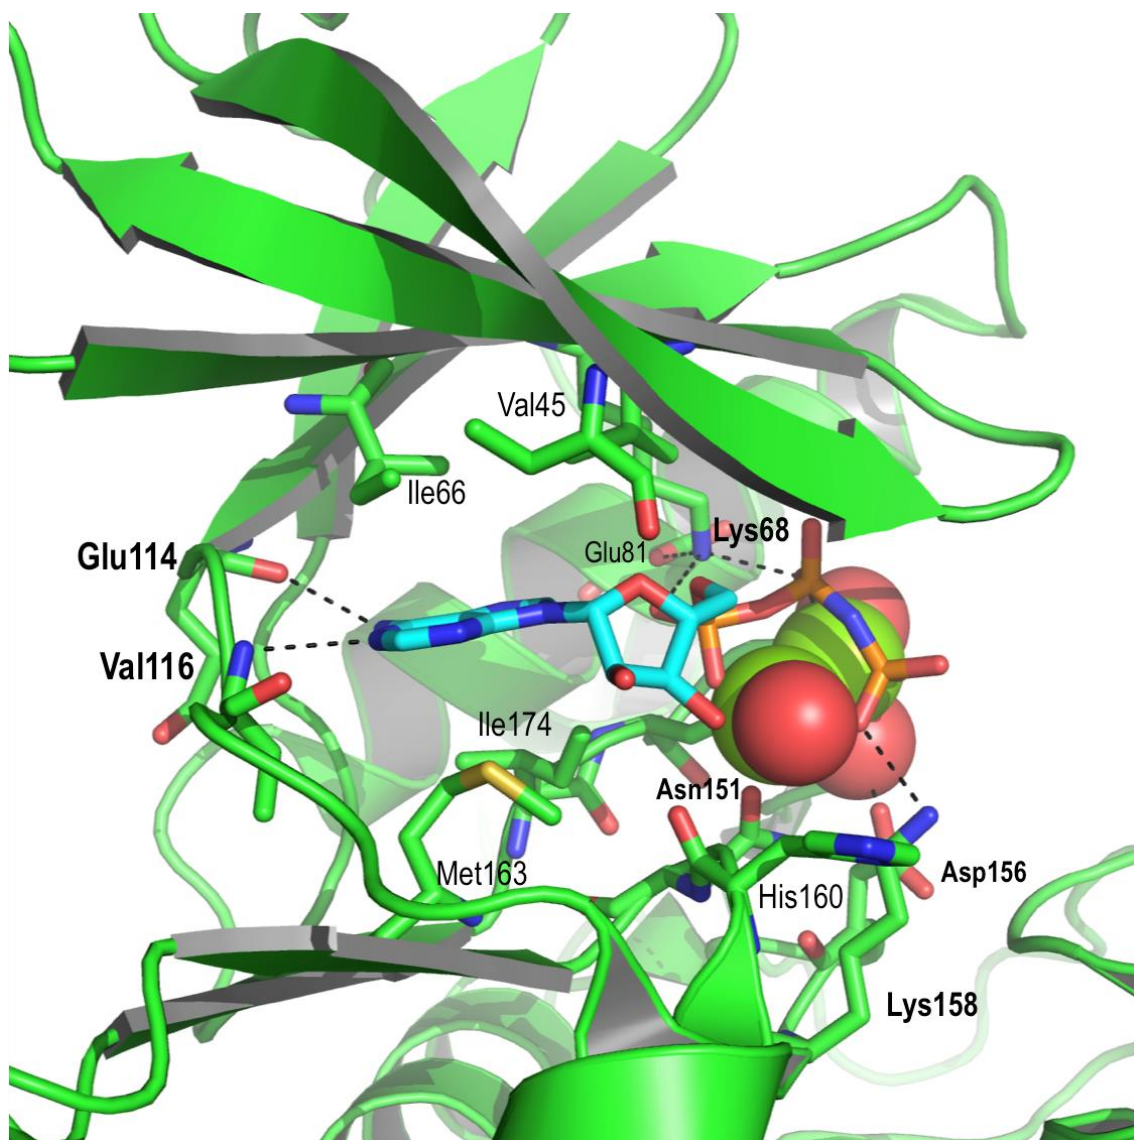

Supplementary Figure S4: PyMOL stick and cartoon representation of the binding of slow-hydrolysis-rate ATP analog ANP (cyan sticks) to the alpha subunit of CK2 such as it appears in PDB structure 1DAW. The main amino acids involved in the binding are represented as sticks, the two  $\text{Mg}^{2+}$  and the water molecules that complete the coordination spheres are represented as green and red sphere respectively. Hydrogen bonding and coordinating interactions are shown as dashed lines and the residues involved are labelled in bold.

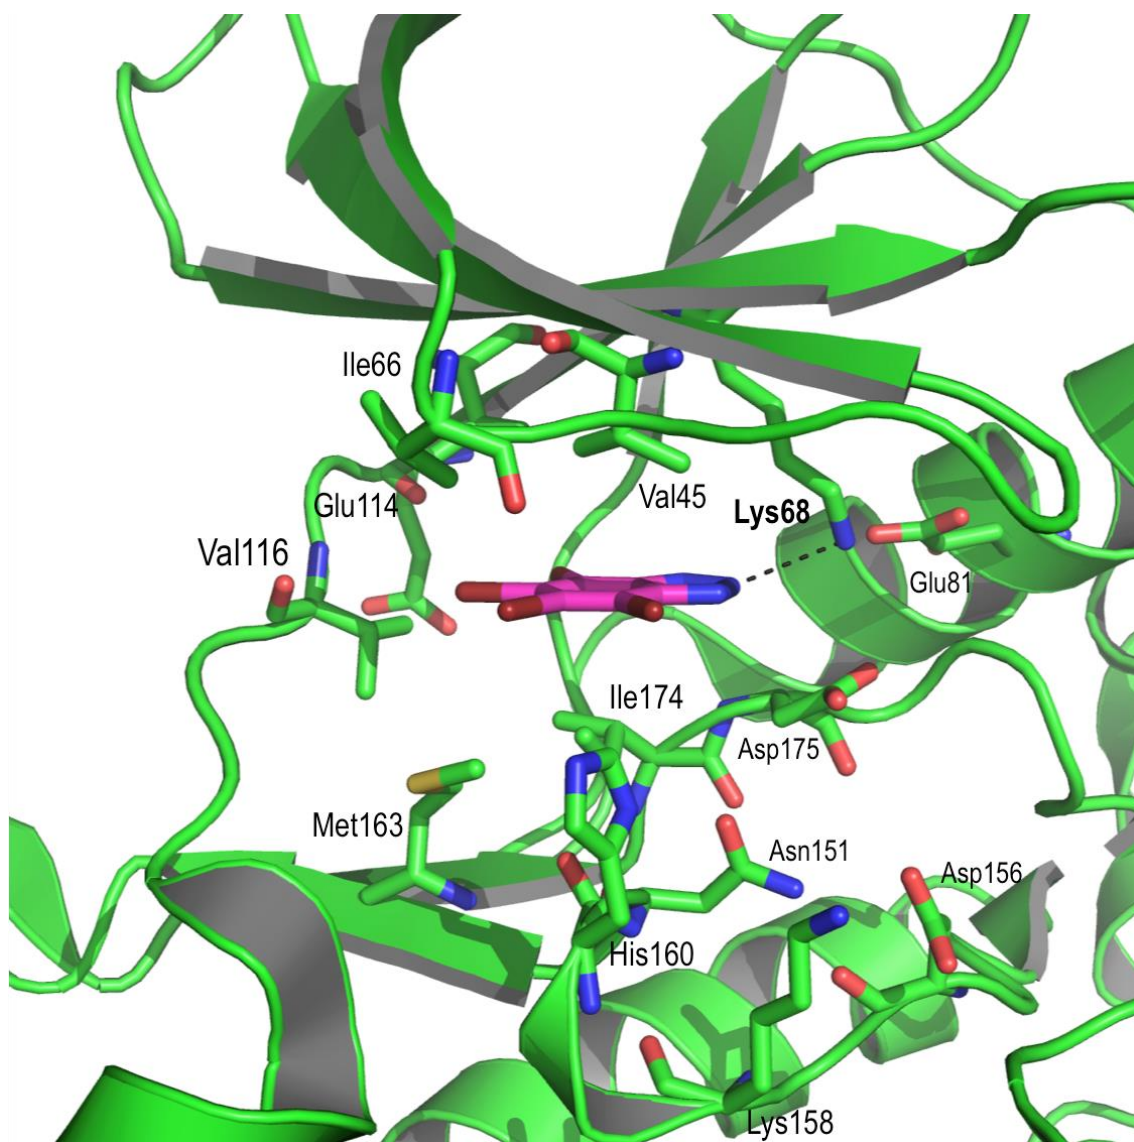

Supplementary Figure S5: PyMOL stick and cartoon representation of the binding of TBB (magenta sticks) to the alpha subunit of CK2 such as it appears in PDB structure 1J91. The main amino acids involved in the binding are represented as sticks, the hydrogen bonding interactions are shown as dashed lines and the residues involved are labelled in bold.

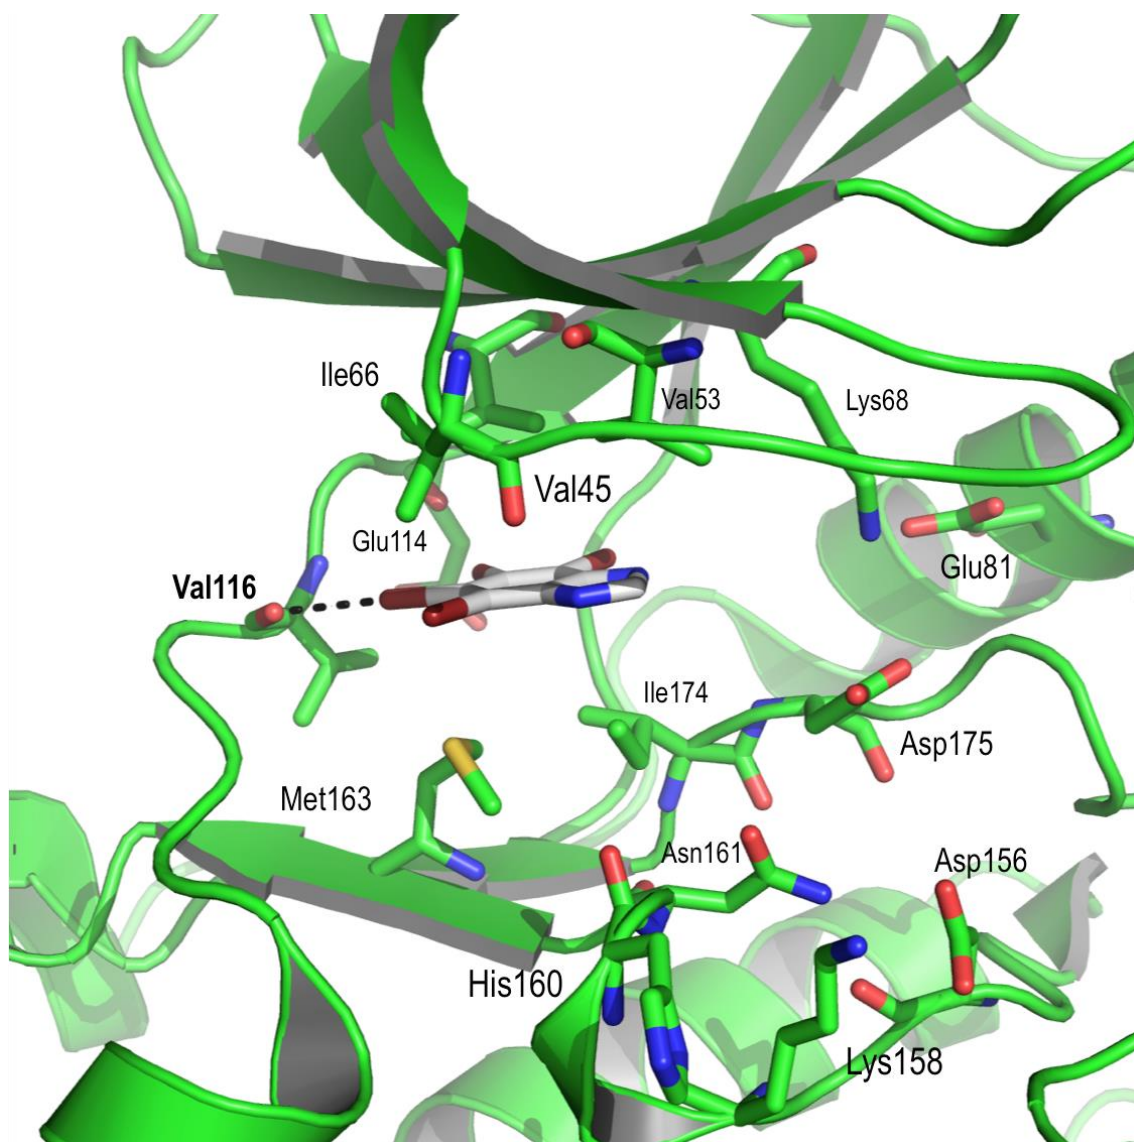

Supplementary Figure S6: PyMOL stick and cartoon representation of the binding of tetrabromobenzoimidazole (white sticks) to the alpha subunit of CK2 such as it appears in PDB structure 2OXY. The main amino acids involved in the binding are represented as sticks, the halogen-bonding interactions are shown as dashed lines and the residues involved are labelled in bold.

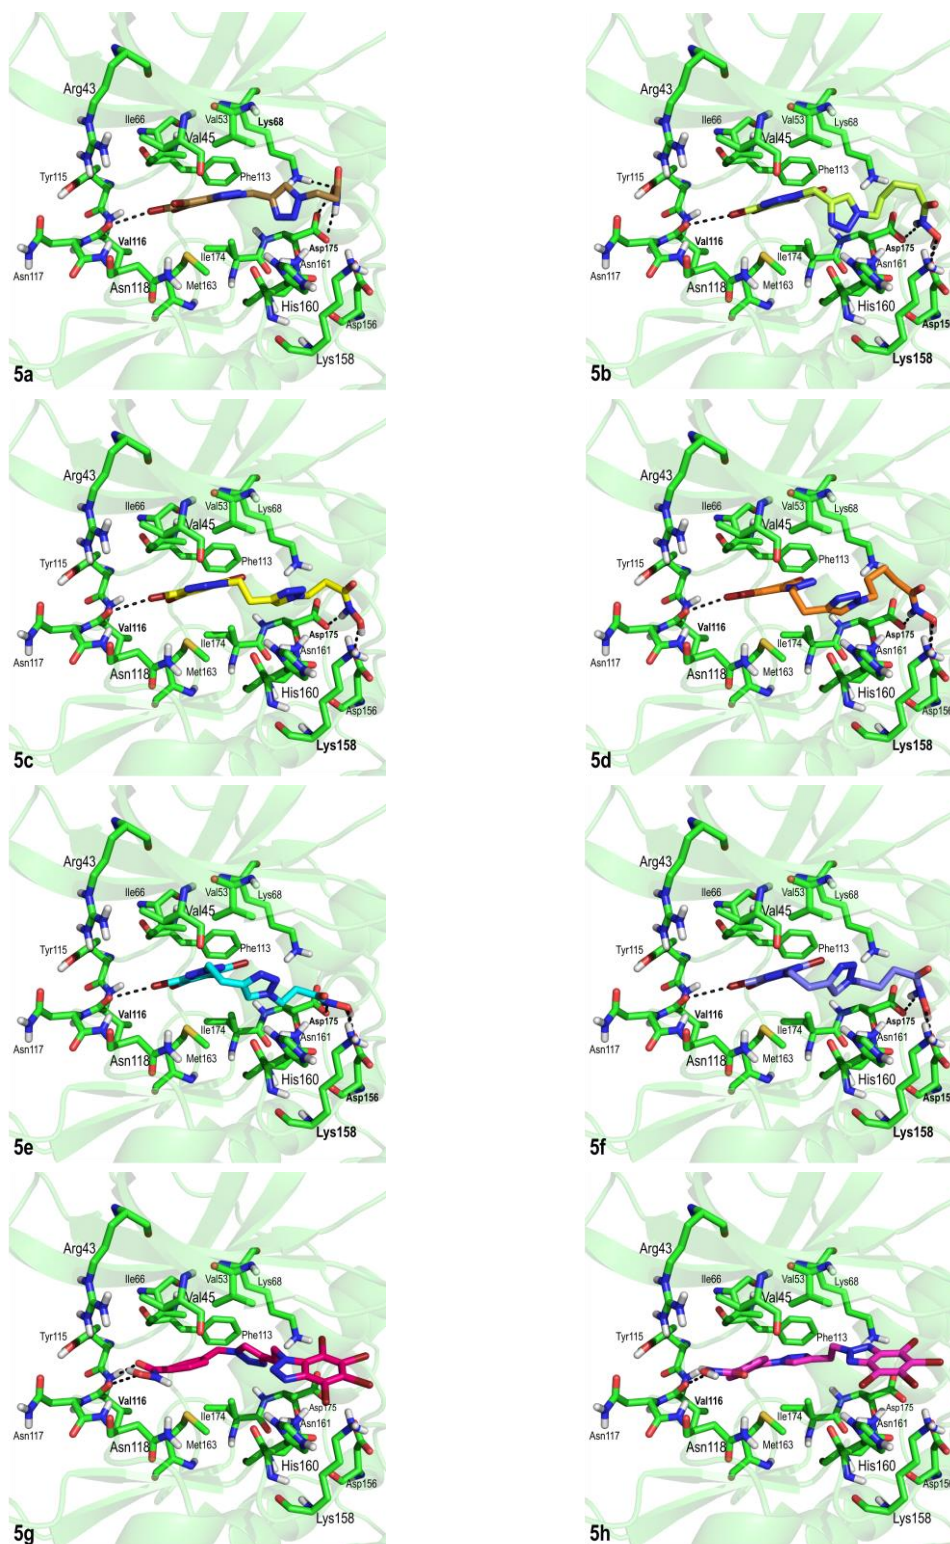

Supplementary Figure S7: PyMOL stick and cartoon representation of the docking poses obtained for the series of new ligands in CK2. The main amino acids involved in the binding are represented as sticks. Hydrogen bonding and halogen bonding interactions are shown as dashed lines and the residues involved are labelled in bold. Compounds **5a** to **5d** are coloured in shades of yellow, **5e** and **5f** are coloured in shades of blue, and **5g** and **5h** are coloured in shades of pink.

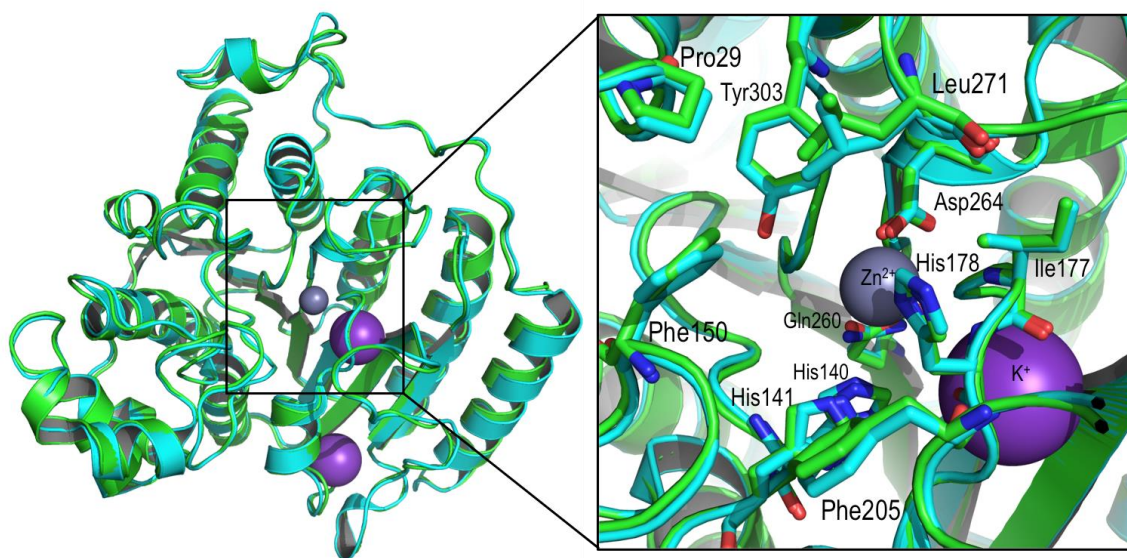

Supplementary Figure S8: PyMOL stick and cartoon representation of the superimposition of the HDAC1 structures from the SWISS MODEL (green) and the HDAC1 crystal structure as it appears in PDB structure 4BKX. The main amino acids of the active site are represented as sticks in the close up (right) where the acetic acid present in 4BKX is not shown for clarity. The catalytic  $\text{Zn}^{2+}$  and the structural  $\text{K}^{+}$  in 4BKX, which occupy the same positions as the cations in the HDAC1 model, are represented as grey and purple spheres, respectively.

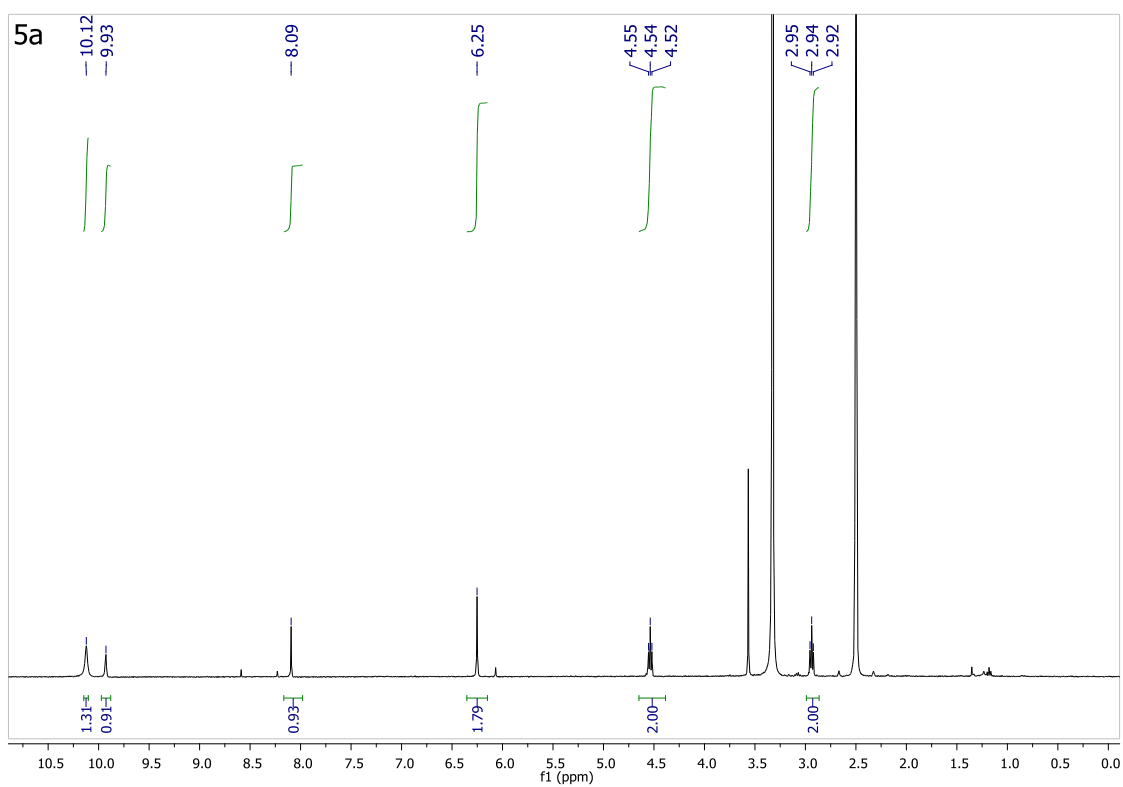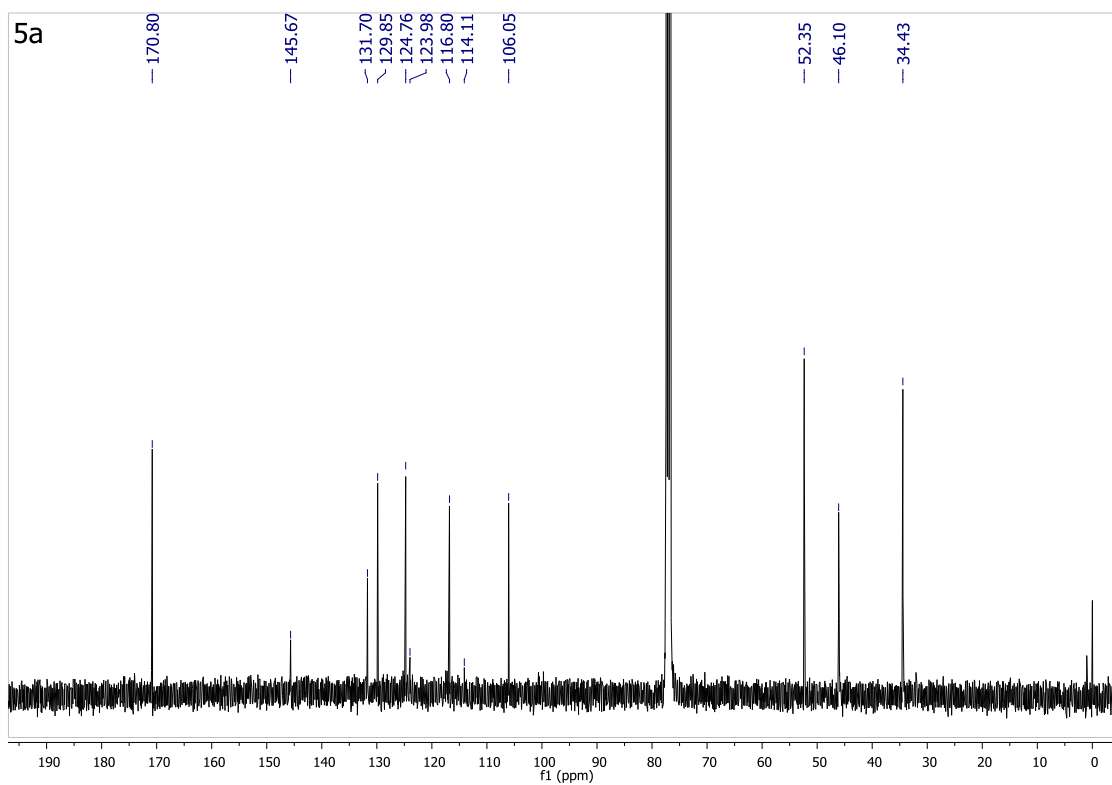

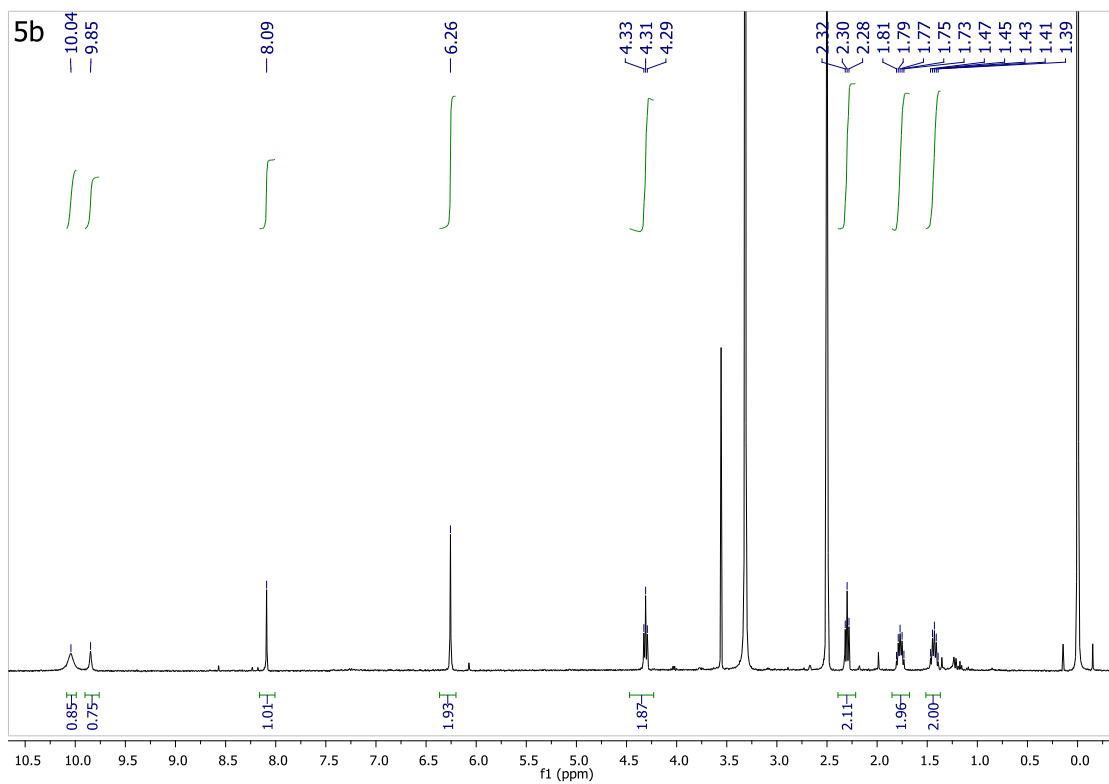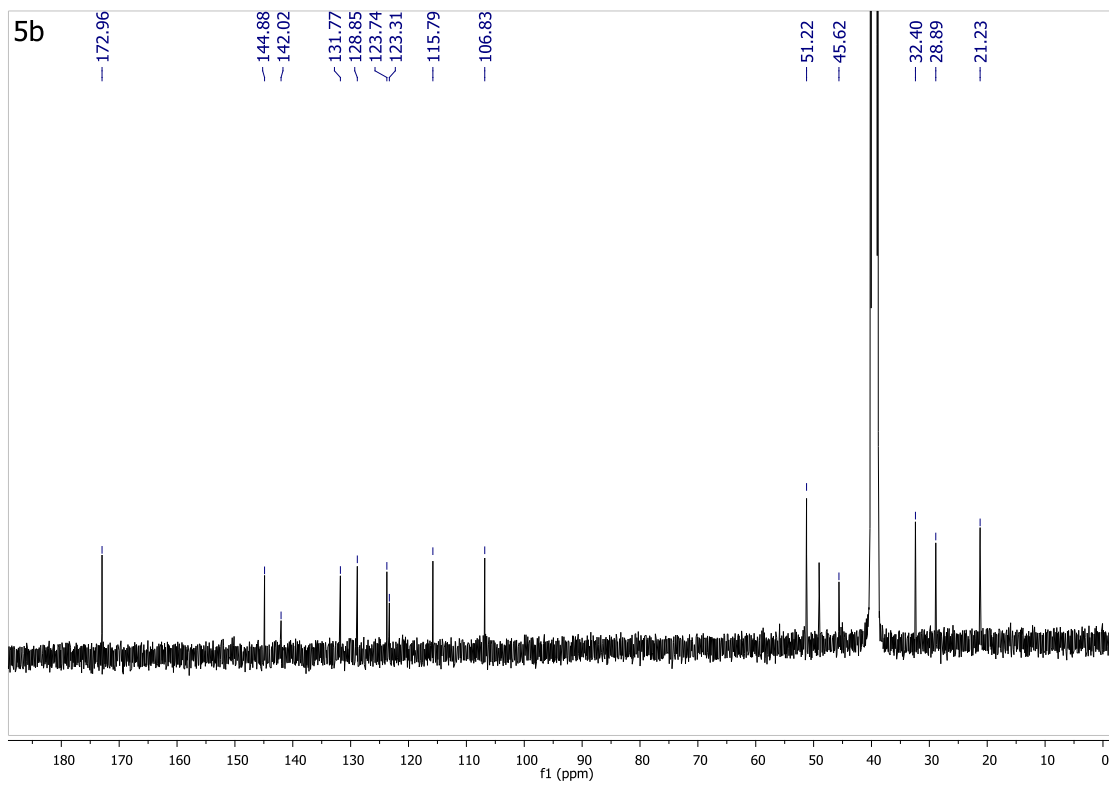

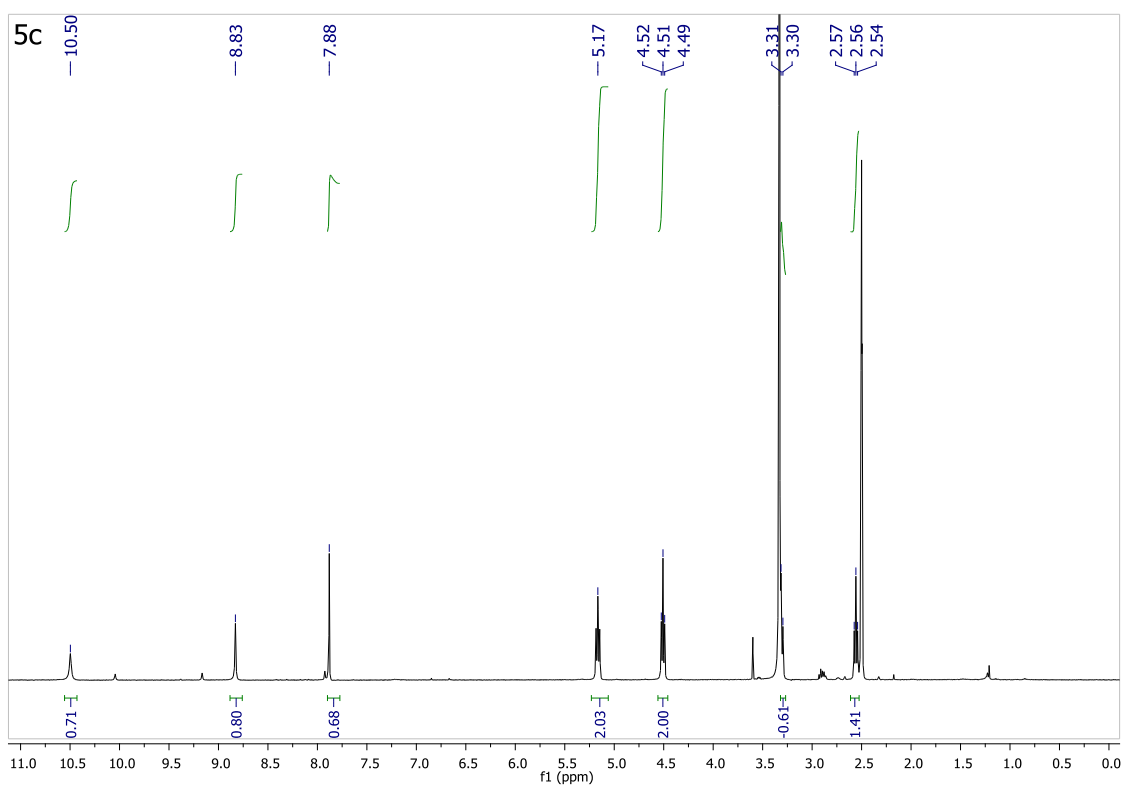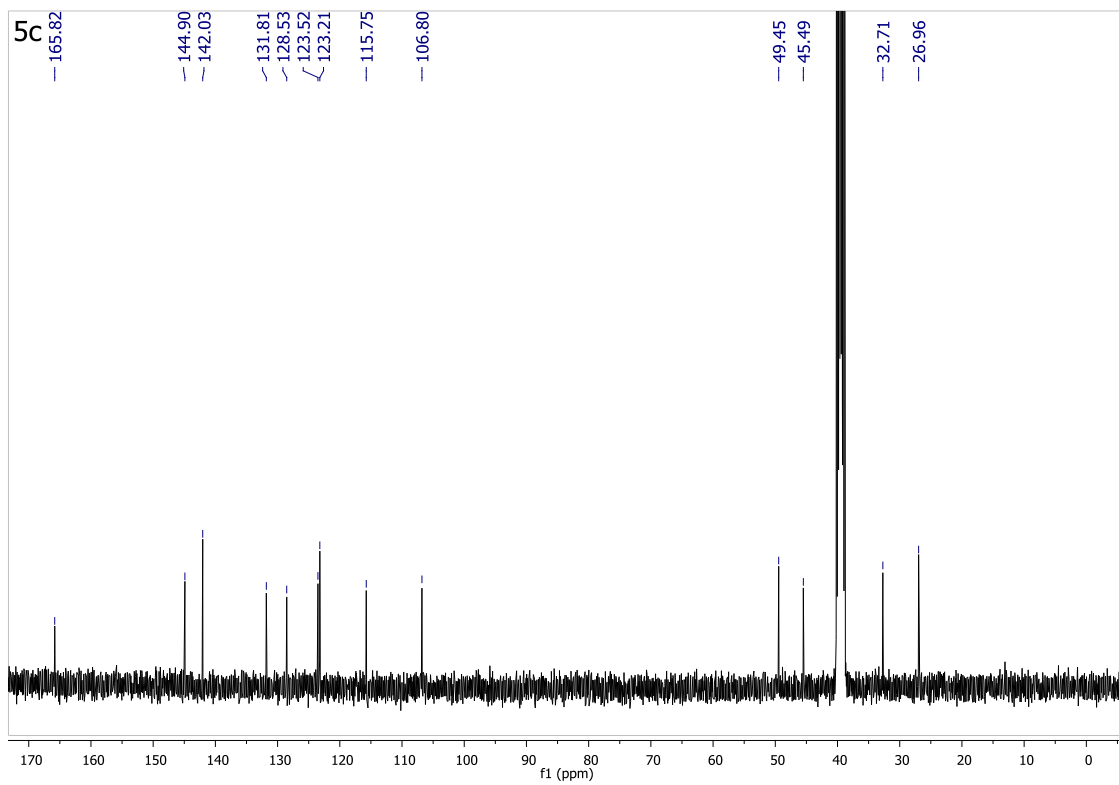

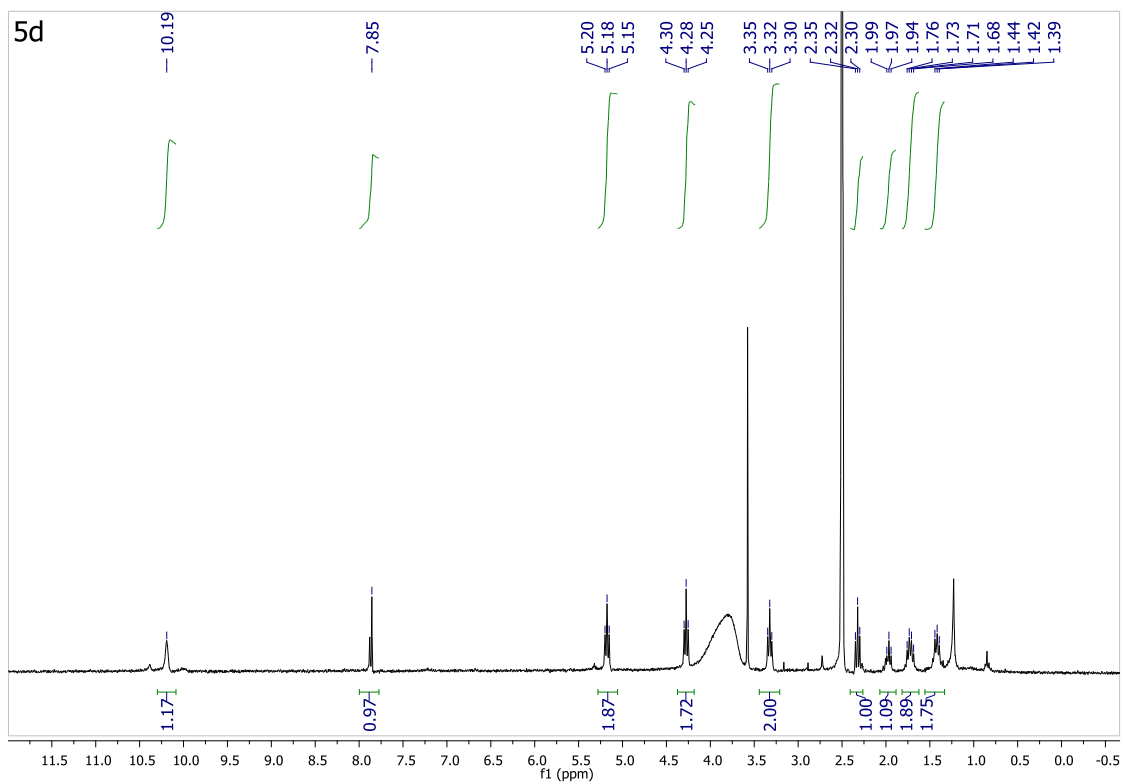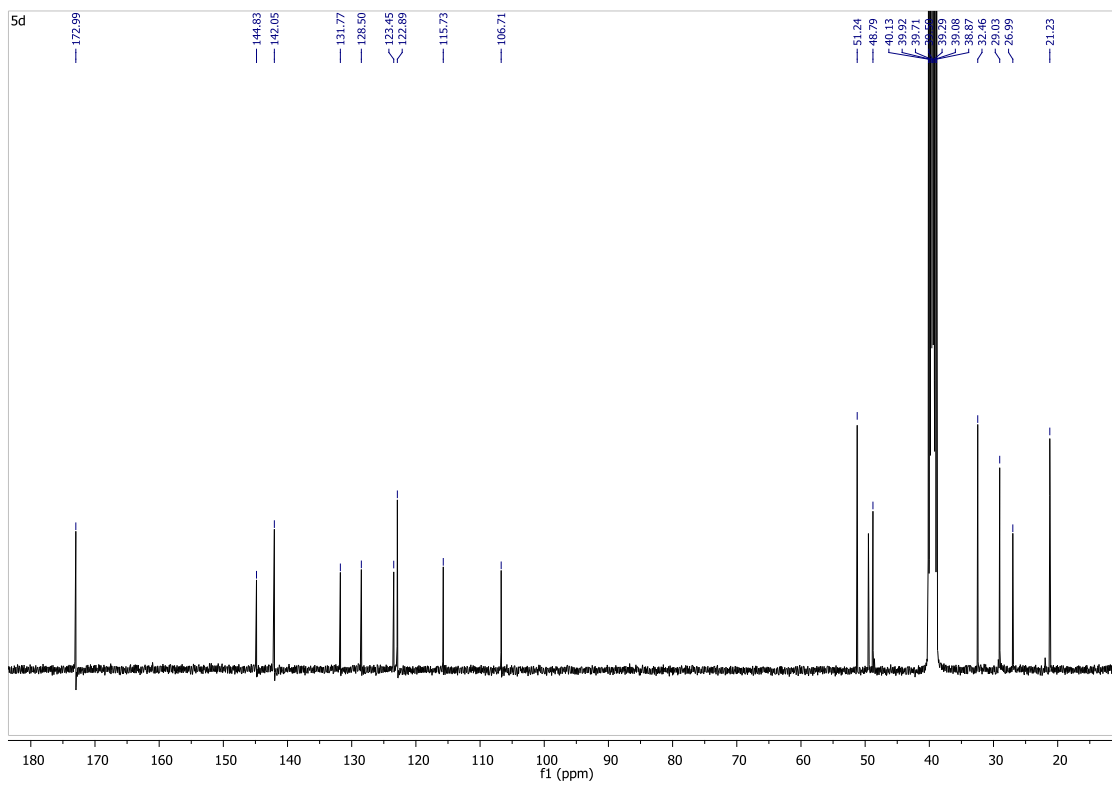

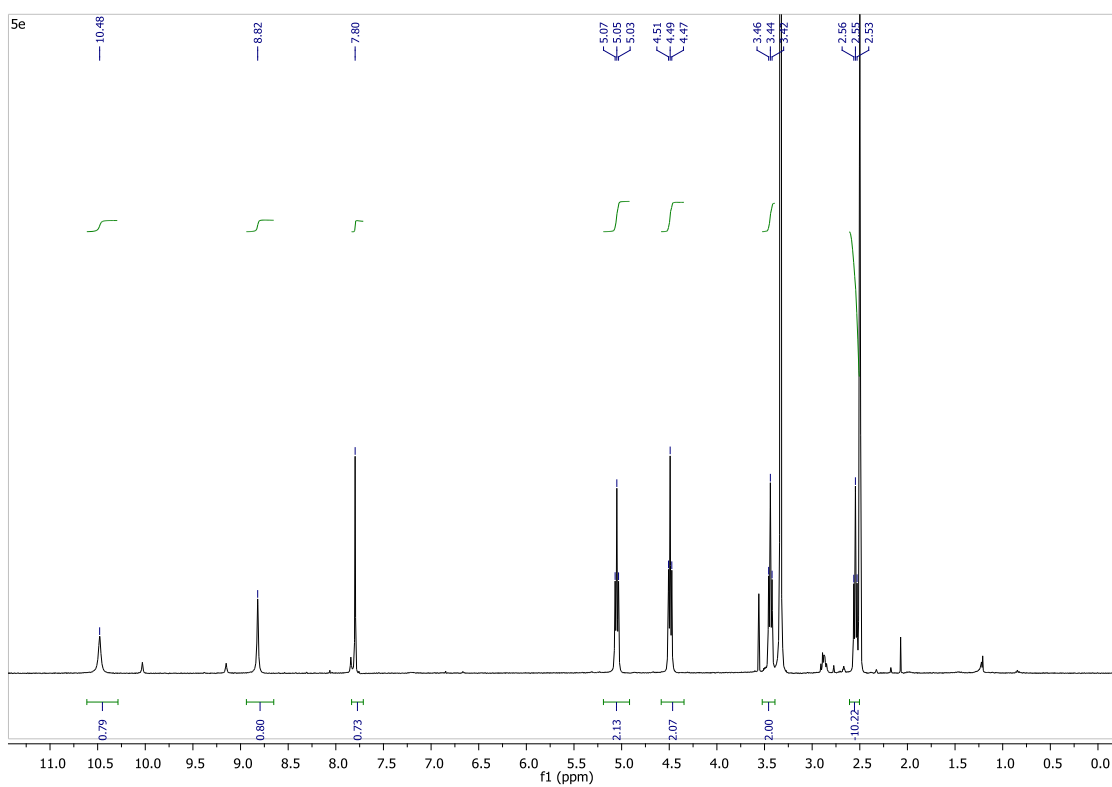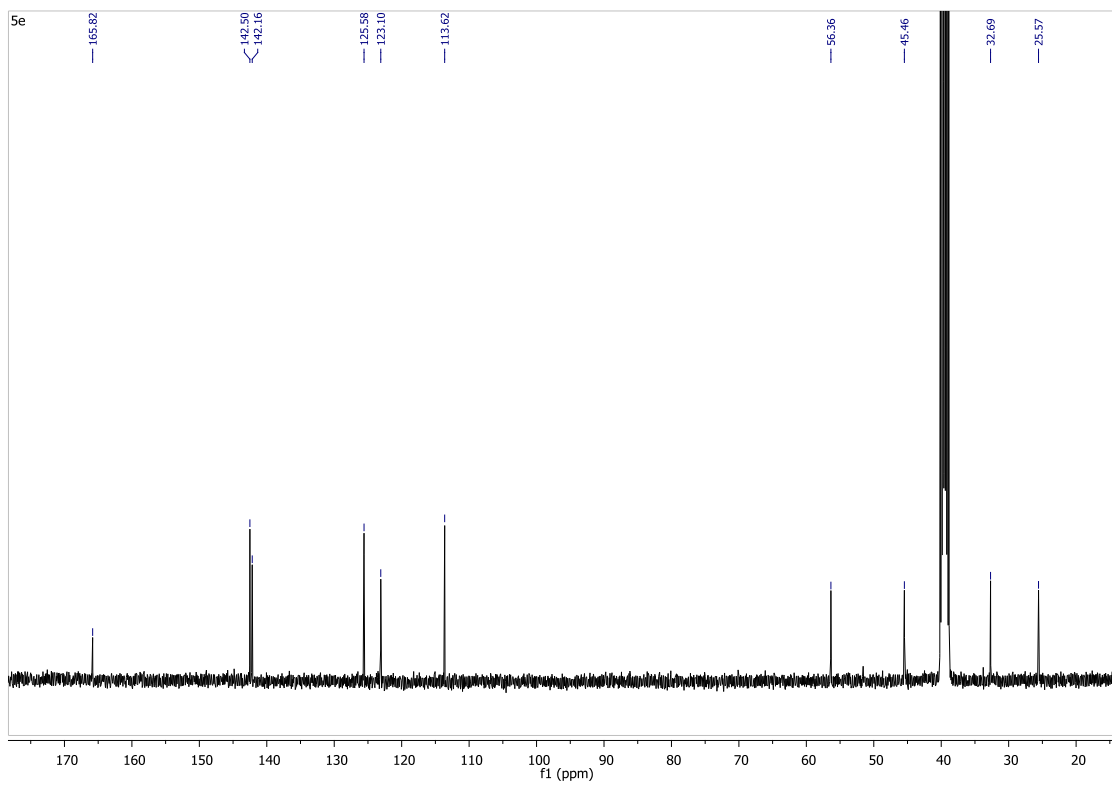

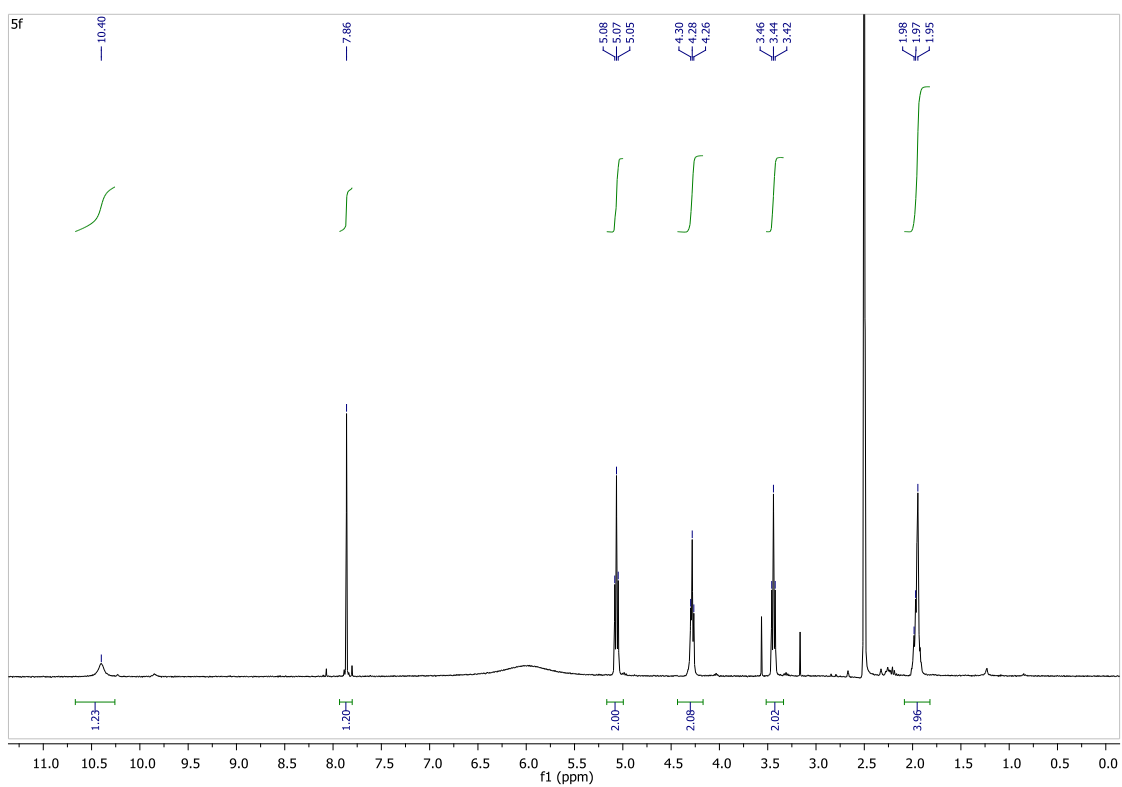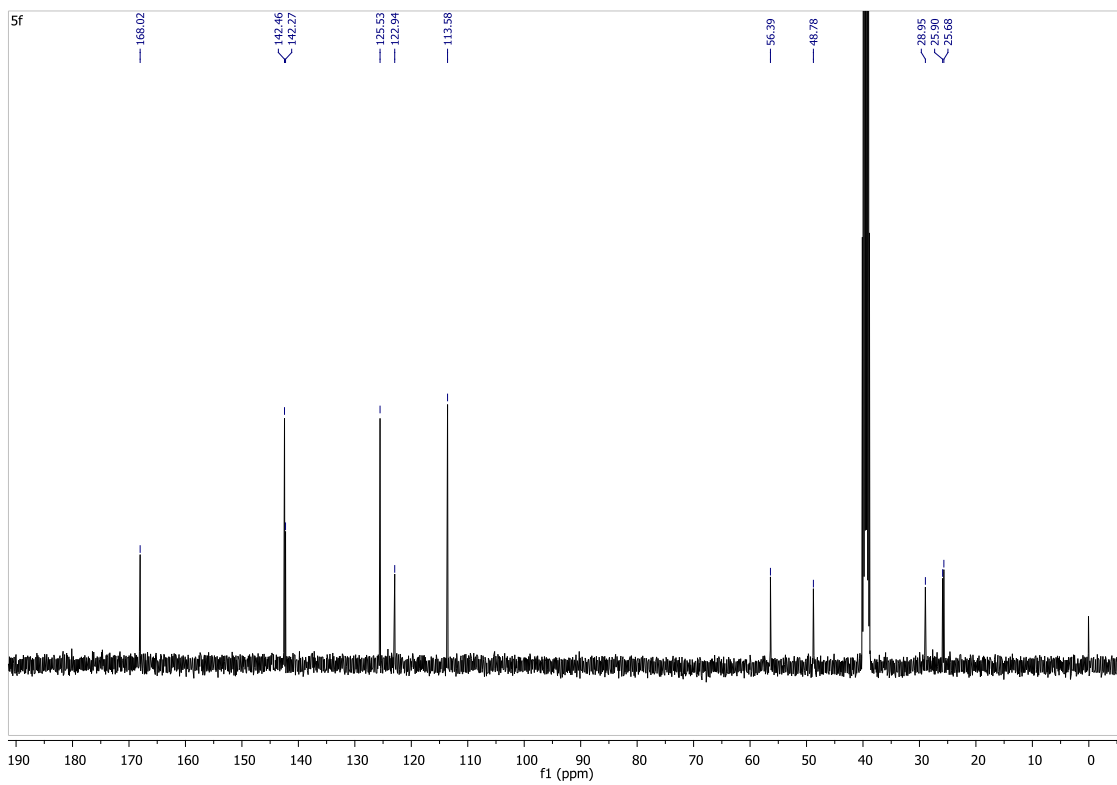

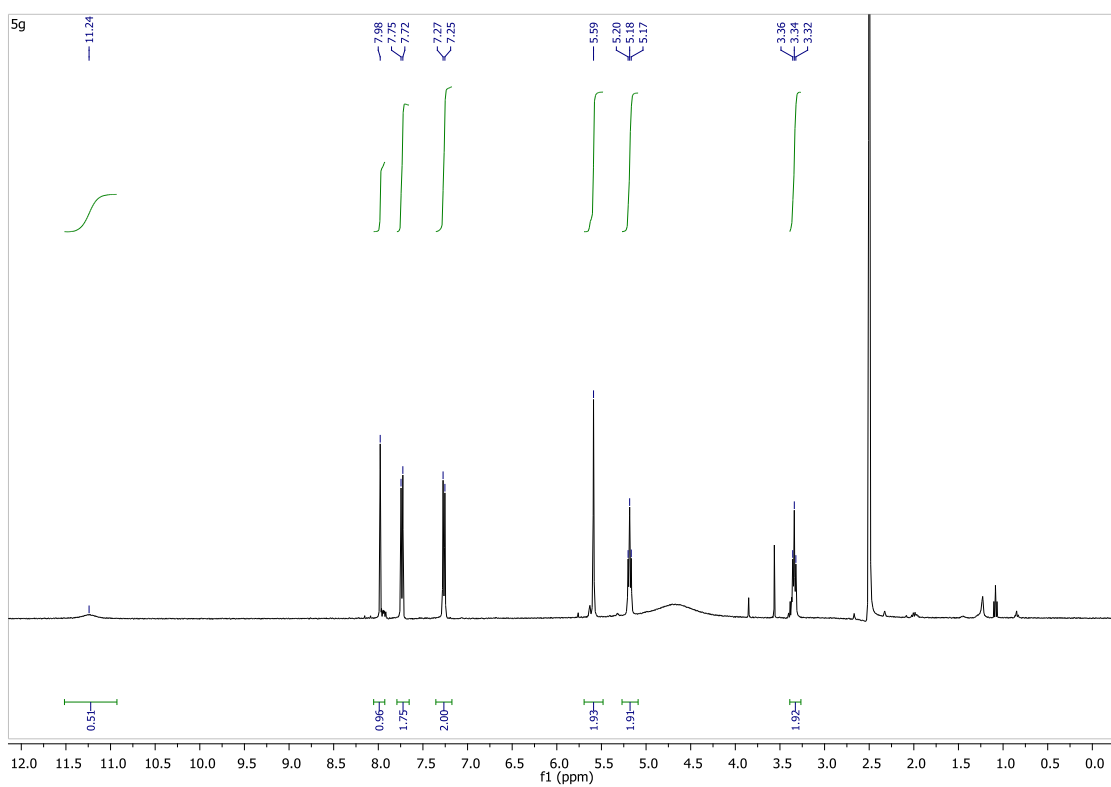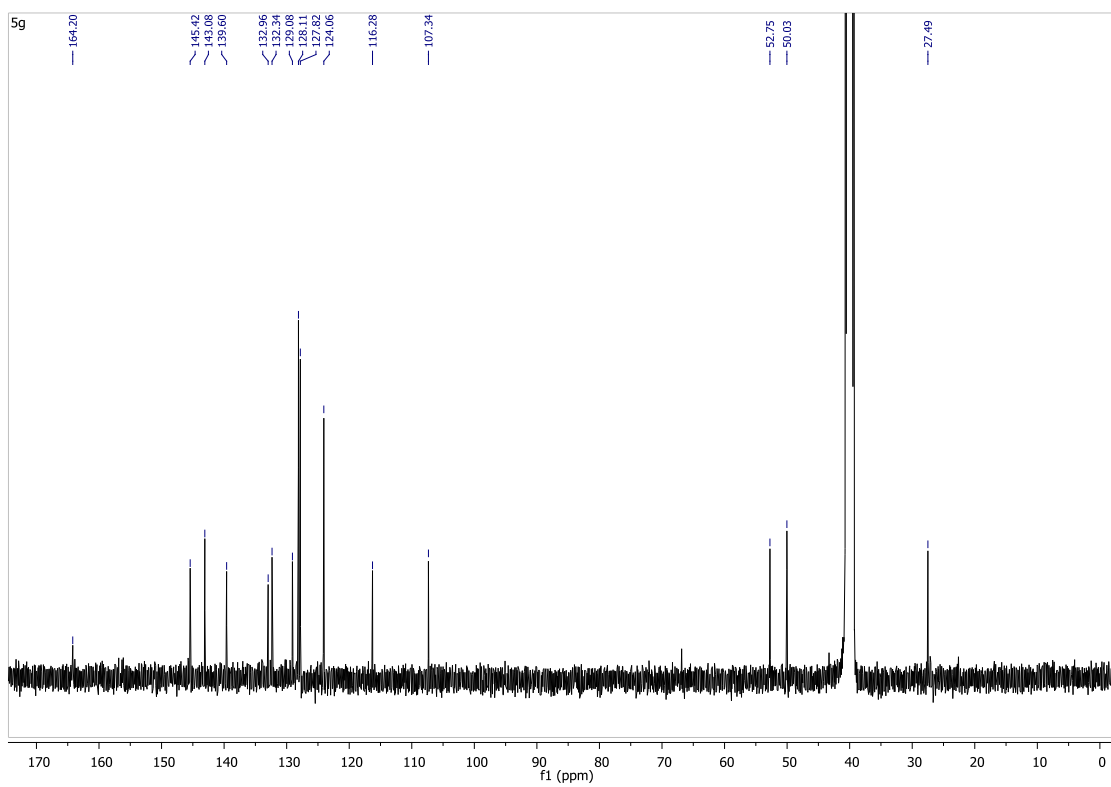

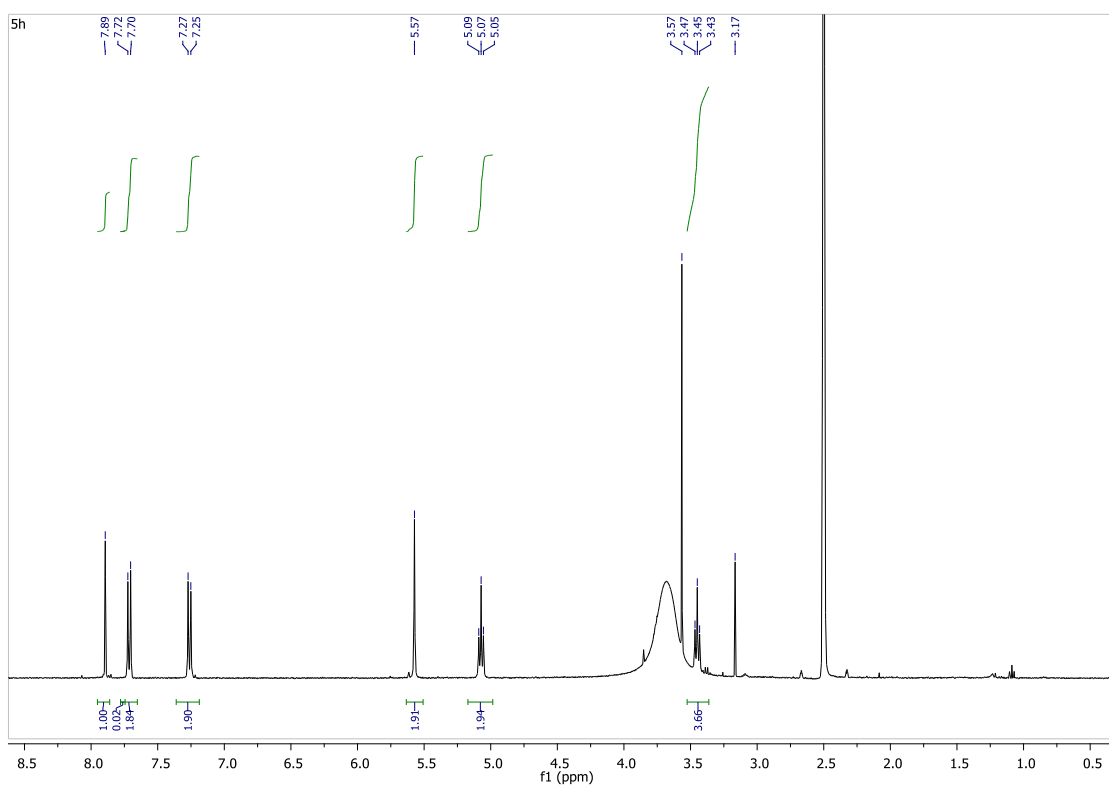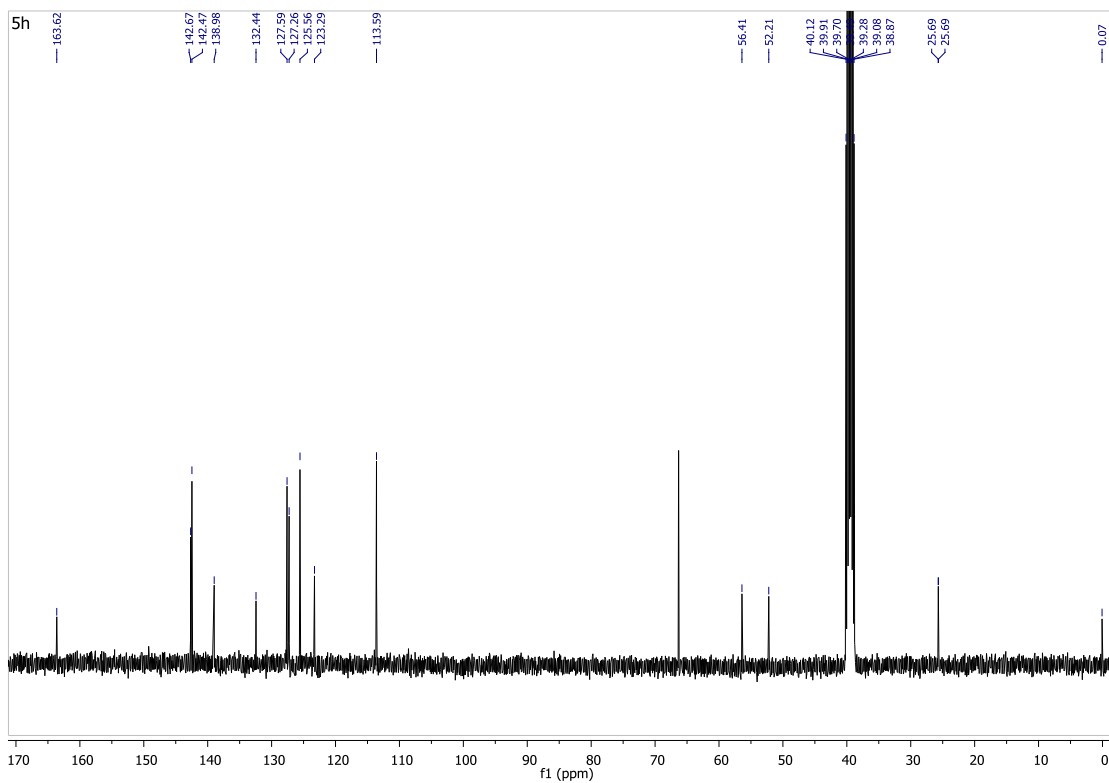

Supplement: c6ra09717k1.pdf [file c6ra09717k1.pdf]
